# Supplementary material for: Molybdenum and rhenium disulfide synthesis via high-pressure carbonate melt
Source: Royal Society of Chemistry journal article supplement (doi:10.1039/c9ce00188c), 2019-01-01
Supplement: c9ce00188c1.pdf [file c9ce00188c1.pdf]

## **Electronic Supplementary Information**

### **Molybdenum and rhenium disulfide synthesis via high-pressure carbonate melt**

Michael Anenburg

Research School of Earth Sciences, Australian National University, Acton ACT 2601,  
Australia

Table S1. Compositions of mixes used in the experiments.

| Experiment                                      | MoS <sub>2</sub> | ReS <sub>2</sub> |
|-------------------------------------------------|------------------|------------------|
| <hr/>                                           |                  |                  |
| Percentage added                                |                  |                  |
| CaCO <sub>3</sub>                               | 41               | 55               |
| Ca <sub>3</sub> (PO <sub>4</sub> ) <sub>2</sub> |                  | 23               |
| SrCO <sub>3</sub>                               |                  | 2                |
| CaF <sub>2</sub>                                |                  | 6.5              |
| Mg(OH) <sub>2</sub>                             |                  | 6                |
| MnCl <sub>2</sub> ·4H <sub>2</sub> O            |                  | 3.5              |
| SiO <sub>2</sub>                                |                  | 4                |
| Fe <sub>2</sub> SiO <sub>4</sub>                | 7                |                  |
| MgCO <sub>3</sub>                               | 40               |                  |
| Na <sub>2</sub> CO <sub>3</sub>                 | 9                |                  |
| Al(OH) <sub>3</sub>                             | 3                |                  |
| Total                                           | 100              | 100              |

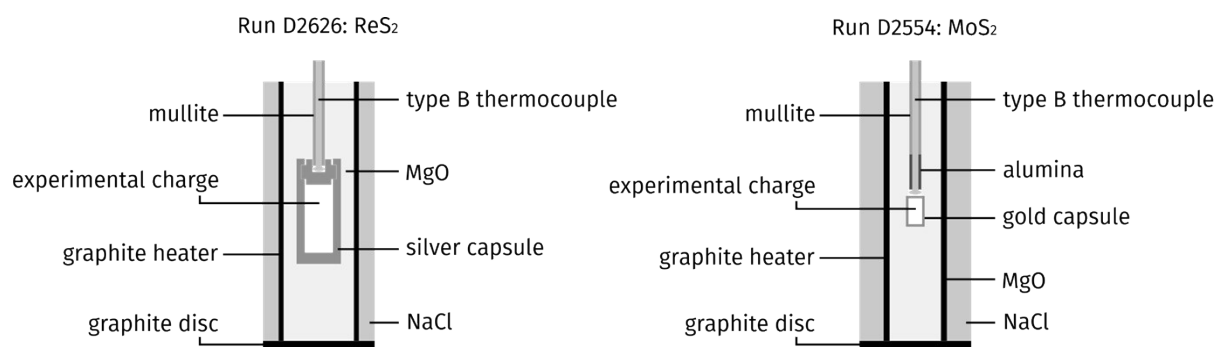

**Figure S1.** To-scale sketches of the two assemblies used in this study.

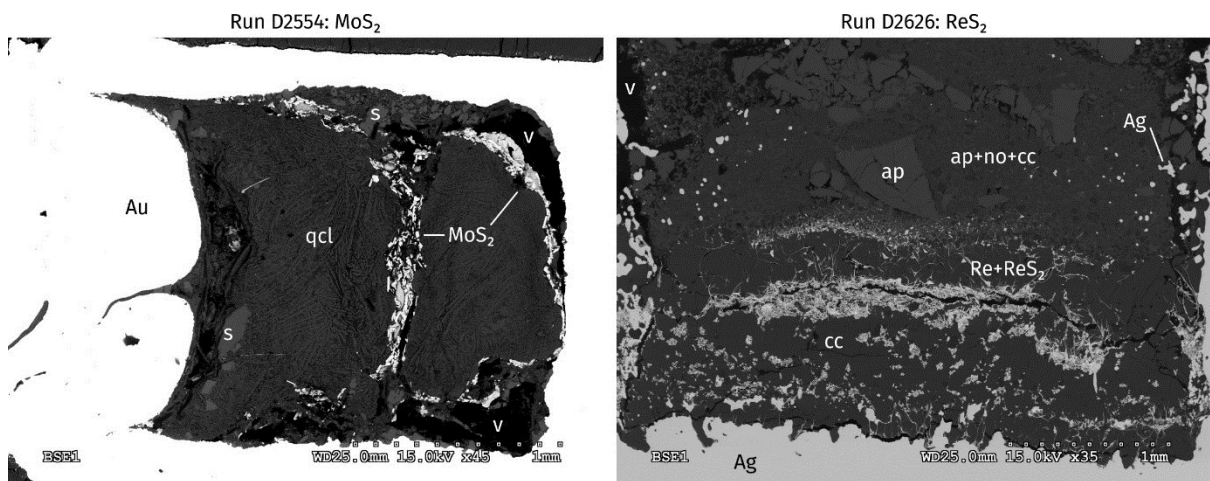

**Figure S2.** Low magnification overviews of the experimental results using backscattered electron imaging. Abbreviations: s–silicate diopside; qcl–quenched carbonate liquid; v–vapour (CO<sub>2</sub> dominated for D2554, mixed CO<sub>2</sub>-H<sub>2</sub>O for D2626); ap–apatite; no–norbergite; cc–calcite.

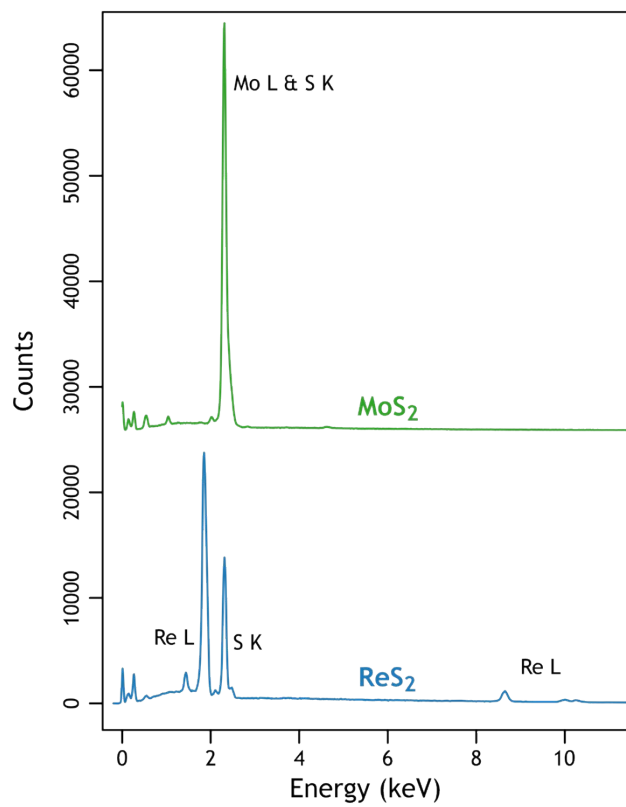

Figure S3. EDS spectra of sulfides from this study.

Table S2. Full results of WDS analyses.

| Element                                   | Mass (%) | Atom (%) |
|-------------------------------------------|----------|----------|
| MoS <sub>2</sub>                          |          |          |
| Na                                        | 0.983    | 2.2186   |
| S                                         | 41.053   | 66.4358  |
| Mo                                        | 57.964   | 31.3455  |
| ReS <sub>2</sub> (TAP for Re M $\alpha$ ) |          |          |
| Si                                        | 0.152    | 0.4435   |
| S                                         | 26.266   | 66.7282  |
| Ca                                        | 0.404    | 0.8201   |
| Re                                        | 73.177   | 32.0082  |
| ReS <sub>2</sub> (PET for Re M $\alpha$ ) |          |          |
| Si                                        | 0.138    | 0.4209   |
| S                                         | 23.776   | 63.8103  |
| Ca                                        | 0.362    | 0.7767   |
| Re                                        | 75.724   | 34.9921  |
